# Supplementary material for: Analysis of passive-sampler monitored atmospheric ammonia at 74 sites across southern Ontario, Canada
Source: Copernicus journal article supplement (doi:10.5194/bg-10-7913-2013), 2013-12-04

## **Supporting Information**

### **Analysis of passive-sampler monitored atmospheric ammonia at 74 sites across southern Ontario, Canada**

X. H. Yao ([xhyao@ouc.edu.cn](mailto:xhyao@ouc.edu.cn)) and L. Zhang ([leiming.zhang@ec.gc.ca](mailto:leiming.zhang@ec.gc.ca))

Figure S1. Inter-comparison of collected  $\text{NH}_3$  concentration between two the passive samplers and active samplers (Passive sampler-12 mm represents Ogawa sampler; Passive sampler -25 mm represents custom-designed sampler).

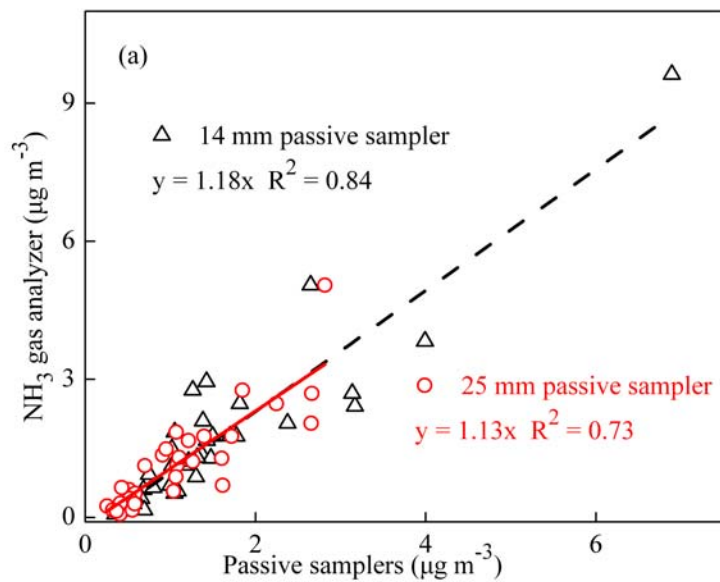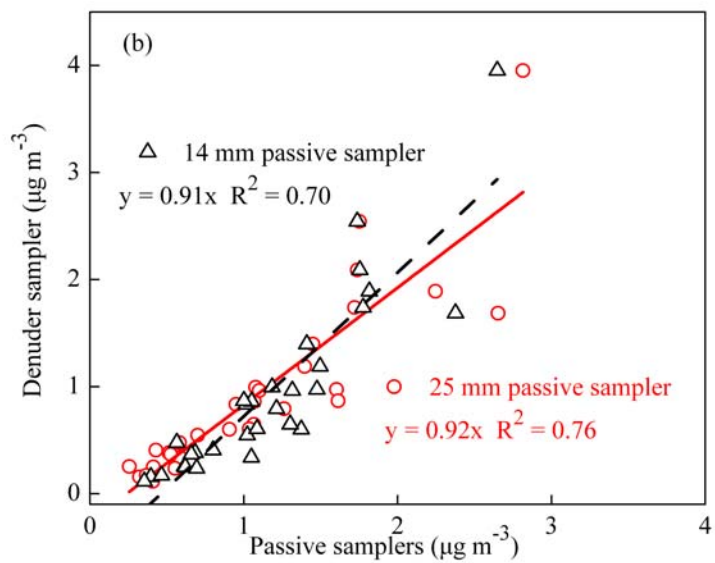

Figure S2. 2011 NAESI NH<sub>3</sub> emission inventory in the unit of ktonnes/year/grid element (15kmx15km).

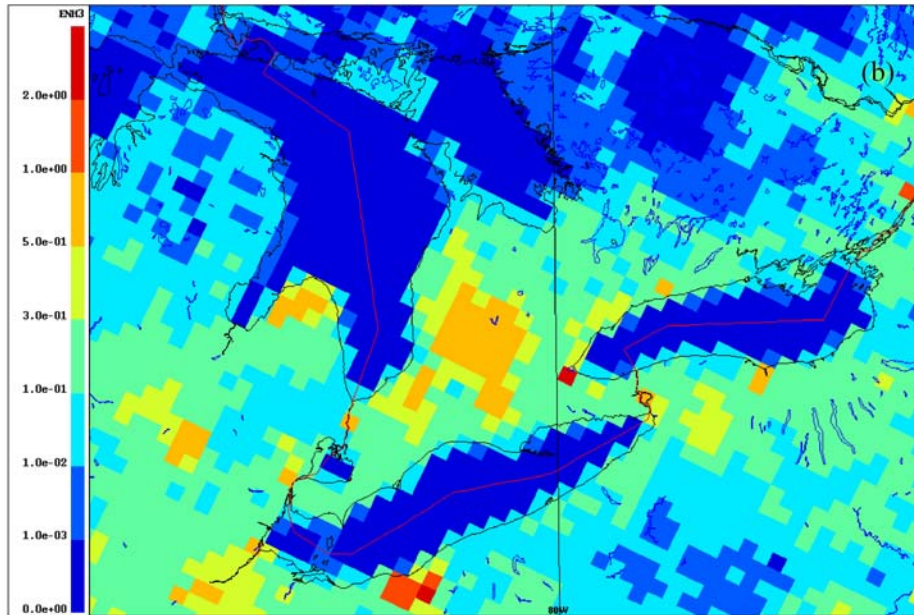

Figure S3: Land use distribution.

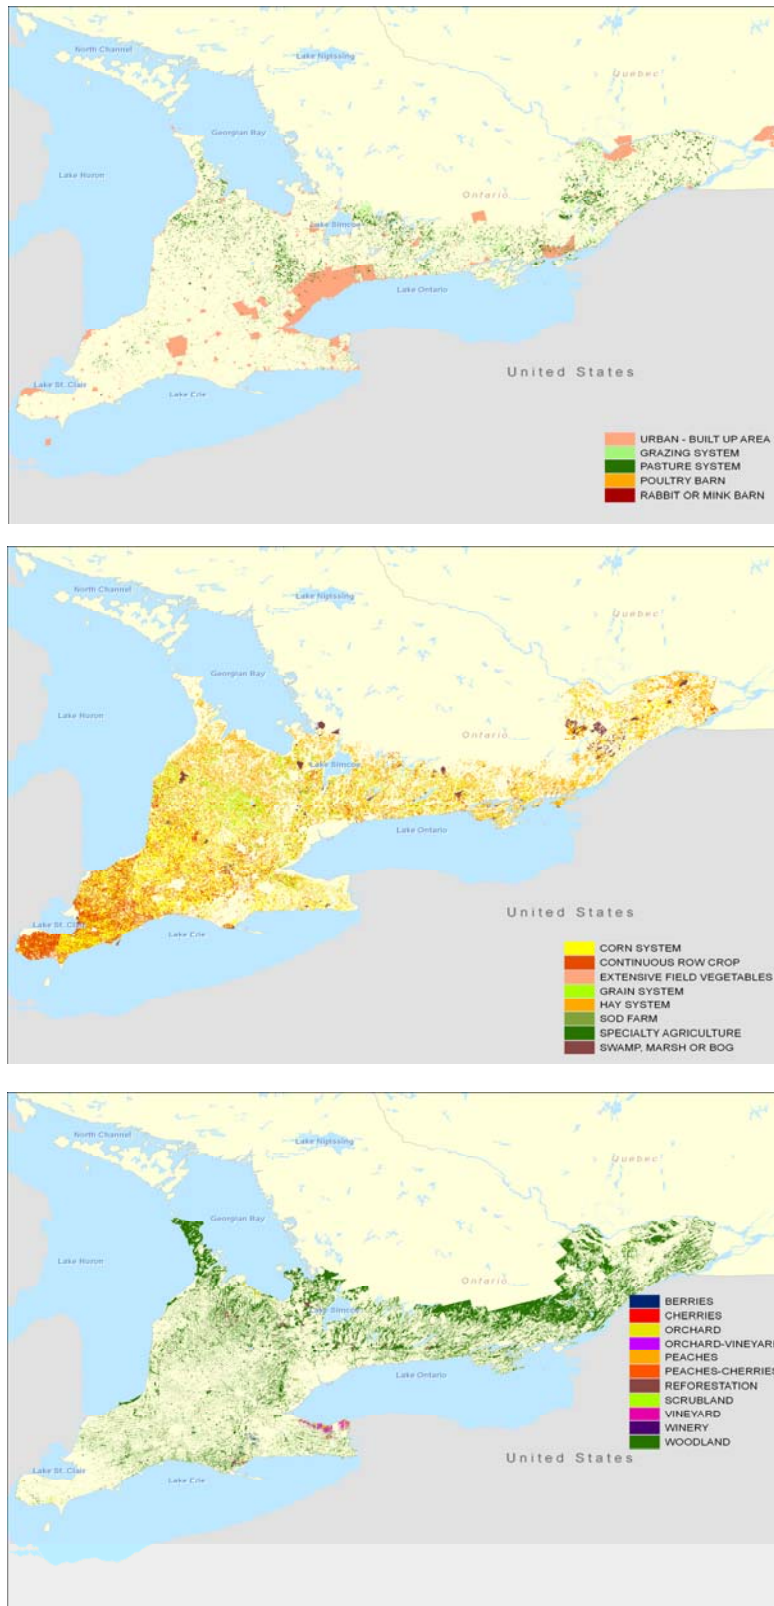

Figure S4. Satellite image data of NO<sub>2</sub> across southern Ontario in 2006 (data was from <http://www.temis.nl/airpollution/no2.html>).

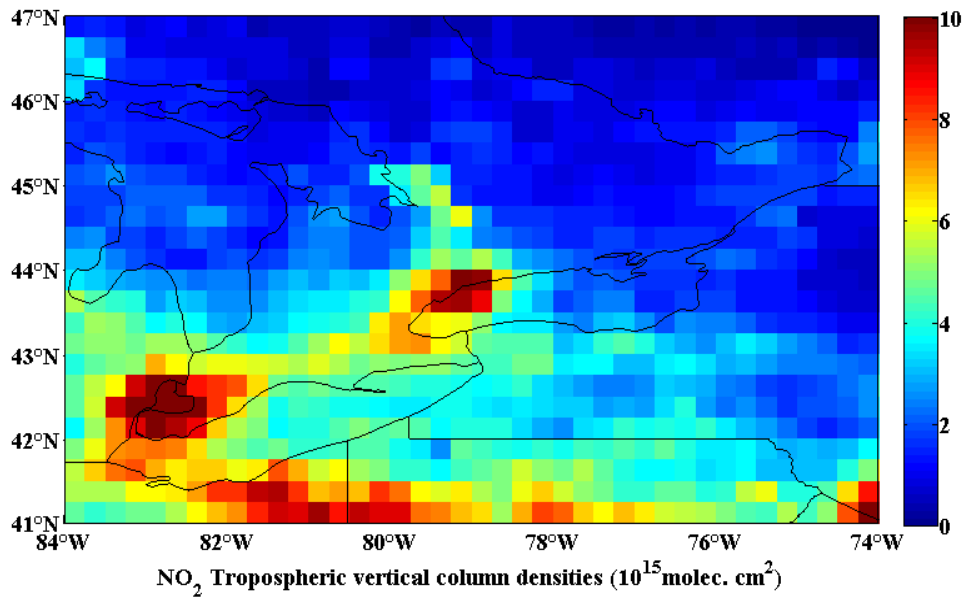

Figure S5. Satellite image data of snow covering across southern Ontario in February 2007 (data was from <http://neo.sci.gsfc.nasa.gov/Search.html?>).

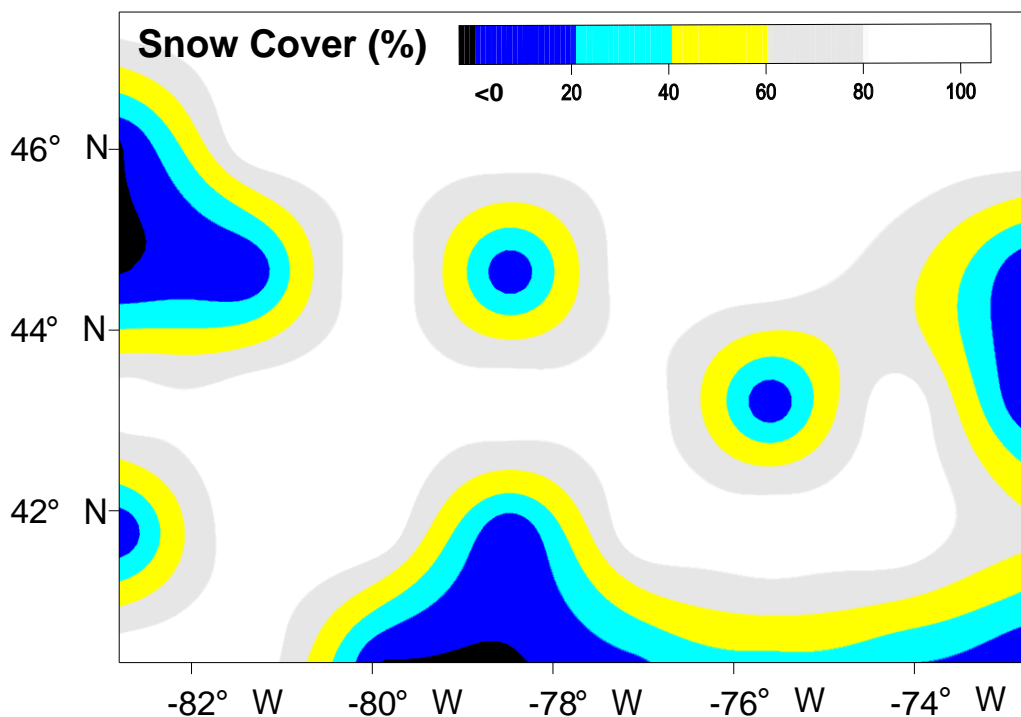

Figure S6: Temporal variation of  $\text{NH}_3$  at CLC in 2006-2007.

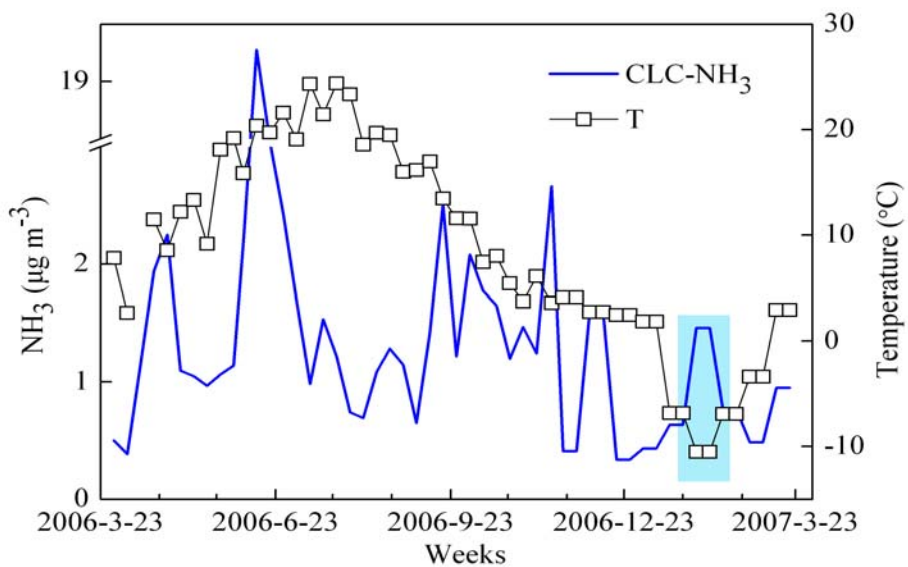

Figure S7. Geographical distribution of the paired sites with negative correlations.

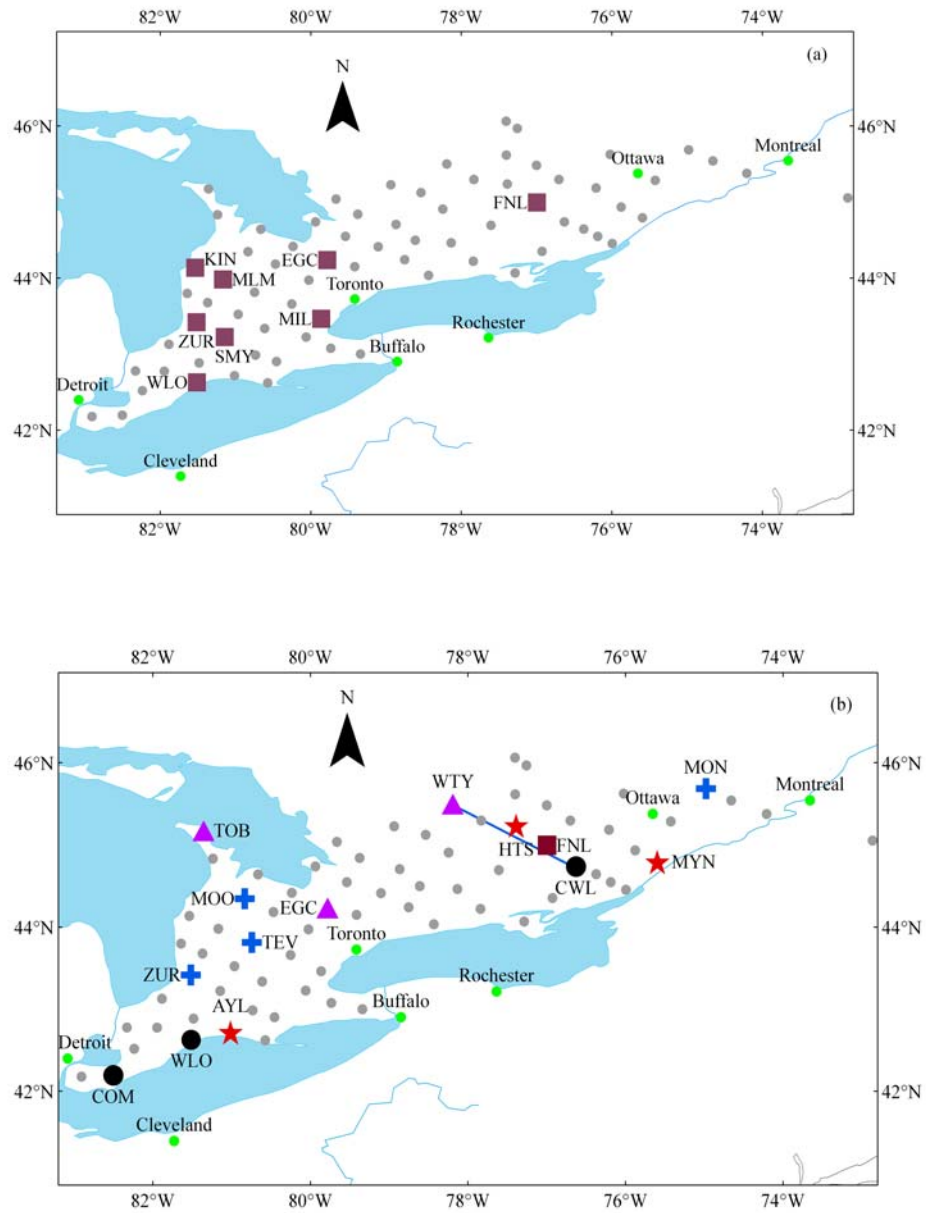

Supplement: Supplementary file 1 [file bg-10-7913-2013-supplement.pdf]
